# Supplementary material for: How Humans Solve Complex Problems: The Case of the Knapsack Problem
Source: PubMed Central journal article supplement (PMC5054396; doi:10.1038/srep34851), 2016-10-07
Supplement: srep34851-s1.pdf [file srep34851-s1.pdf]

1 **How Humans Solve Complex Problems: The Case of the**  
2 **Knapsack Problem**

3

4 Carsten Murawski<sup>1</sup> and Peter L.Bossaerts<sup>1,2,3</sup>

5

6 <sup>1</sup>Department of Finance, The University of Melbourne, Melbourne, Victoria 3010, Australia

7 <sup>2</sup>Florey Institute of Neuroscience and Mental Health, Melbourne, Victoria 3010, Australia

8 <sup>3</sup>David Eccles School of Business, University of Utah, Salt Lake City, UT 84112, USA

## 9 SUPPLEMENTARY INFORMATION

### 10 1 Supplementary Methods

#### 11 1.1 The 0-1 knapsack problem

12 The 0-1 knapsack problem is the problem of finding in a set of items of given values and  
13 weights the subset of items with the highest total value, subject to a total weight constraint [1,  
14 2]. Mathematically, the problem can be written as

$$\max \sum_{i=1}^I v_i w_i \text{ subject to } \sum_{i=1}^I w_i x_i \leq C \text{ and } x_i \in \{0, 1\}, \quad (1)$$

15 where  $I$  is the total number of items,  $v_i$  and  $w_i$ ,  $i = 1, \dots, I$ , denote value and weight, respec-  
16 tively, of an item and  $C$  is the capacity (maximum weight) of the knapsack.

17 The 0-1 knapsack problem is a combinatorial optimisation problem. Finding the optimal  
18 knapsack is a member of the complexity class *non-deterministic polynomial-time (NP) hard*  
19 and the corresponding decision problem of ascertaining whether a target value or greater can  
20 be obtained by a subset of items is a member of the complexity class *NP-complete* [2]. A  
21 complexity class is a set of functions that can be computed within given resource bounds [3].  
22 Members of complexity classes differ in the rate at which computational resources, such as time  
23 and memory, grow as the size of a problem's instance increases. An important class comprises  
24 problems for which computational time increases as a polynomial of the problem's size (class  
25 polynomial-time, or P). If an algorithm exists that solves a problem in polynomial time, it  
26 is called "efficient" [4]. Thus, members of class P are those problems for which there exist  
27 efficient solution algorithms. The (optimisation version of the) KP is NP-hard, which means that  
28 there are no known efficient algorithms for it. Membership of a complexity class is determined  
29 based on the hardest instances of a problem and some instances of a given problem may require  
30 less time and memory than others.

## 31 1.2 Representing instances of the knapsack problem as graphs

32 An instance of the 0-1 knapsack problem can be represented as an undirected graph  $G = (V, E)$   
33 comprising vertices,  $V$ , and edges,  $E$  [5]. We call a subset of items (knapsack) *admissible* if  
34 the combined weight of the items is less than or equal to the capacity of the knapsack,  $C$ . Each  
35 admissible subset  $s$  of items is represented by a vertex  $i \in V$ . We define the *order* of a graph  
36  $|G|$  as the number of vertices of the graph. Note that  $|G|$  will usually be lower than the number  
37 of all possible subsets of items, which is equal to  $2^I + 1$  (including the empty set), because  
38 some possible subsets are not admissible due to the weight constraint. We define value  $v_i$  and  
39 weight  $w_i$  of a vertex  $i$  as the sum of the values and weights, respectively, of the subset of  
40 items represented by vertex  $i$ . Two vertices  $i, j \in V$  are connected by an edge  $(i, j)$  if vertex  
41  $j$  can be reached from vertex  $i$  by adding one item to or removing one item from the knapsack  
42 represented by vertex  $i$ , that is, if the difference between the sets of items represented by the  
43 two vertices contains exactly one item. Because the graph  $G$  is undirected,  $(i, j) = (j, i)$  for all  
44  $i, j \in V$ . We call a vertex  $i$  *incident* with edge  $e$  if  $i \in e$ , and we call the two vertices  $i, j \in G$   
45 connected by edge  $(i, j)$  *adjacent* to each other. We define the *degree*  $d_G(i)$  of vertex  $i$  as the  
46 number  $|E(i)|$  of edges at  $i$ . We assign each edge  $(i, j) \in E$  a weight  $w_{ij}$  equal to 1. A *path* is  
47 a graph  $P = (V', E')$  of the form  $V = \{x_0, x_1, \dots, x_k\}$  and  $E = \{x_0x_1, x_1x_2, \dots, x_{k-1}x_k\}$ ,  
48 where the  $x_i$  are all distinct. The vertices  $x_0$  and  $x_k$  are linked by  $P$ . We define the *length* of  
49  $P$  as the sum of the weights of its edges. We define the *distance*  $\ell_G(i, j)$  in  $G$  of two vertices  
50  $i, j$  as the length of a shortest  $i$ - $j$  path in  $G$ . The distance  $\ell_G$  is conceptually related to the *edit*  
51 *distance* often used in computer science [6]. We call the graph  $G$  representing a given instance  
52 of the 0-1 knapsack problem the *graph induced by the instance*.

53 We also define the undirected graph  $\bar{G} = (\bar{V}, \bar{E})$  with vertices  $\bar{V}$  and edges  $\bar{E}$  defined as  
54 in  $G$  except that edge weights are set equal to the value of the item whose addition to or removal  
55 from the knapsack is represented by the edge. Paths in  $\bar{G}$  are defined similarly to paths in  $G$ .  
56 The distance  $\ell_{\bar{G}}(i, j)$  of the two vertices  $i$  and  $j$  now represents the difference in values of the

57 two vertices. The solution of the knapsack problem represented by graph  $\bar{G}$  can be found by  
 58 computing the longest path in  $\bar{G}$  [7]. We call the vertex  $i \in V$  representing the solution of the  
 59 instance the *solution node*.

60 Finally, we define the directed graph  $\vec{G} = (\vec{V}, \vec{E})$  with vertices  $\vec{V}$  as defined in  $G$ . Two  
 61 vertices  $i, j \in \vec{V}$  are connected by an edge  $(i, j)$  if vertex  $j$  can be reached from vertex  $i$  by  
 62 adding one item to the knapsack represented by vertex  $i$ , and vice versa for removals of items.  
 63 Note that in graph  $\vec{G}$ ,  $(i, j) \neq (j, i)$  for all  $i, j \in \vec{V}$ . We assign each edge  $(i, j) \in \vec{E}$  a weight  
 64  $w_{ij} = v_j - v_i$ . Paths in  $\vec{G}$  are defined as in  $G$ . The distance  $\ell_{\vec{G}}(i, j)$  of the two vertices  $i$   
 65 and  $j$  represents the difference in values of the two vertices. We define the *out-degree*  $d_{\vec{G}}^{out}(i)$   
 66 of vertex  $i$  as the number of edges leaving vertex  $i$ , and the *in-degree*  $d_{\vec{G}}^{in}(i)$  of vertex  $i$  as the  
 67 number of edges terminating at vertex  $i$ . We call the vertex in  $\vec{G}$  representing the empty set  
 68 (knapsack) the *initial vertex*. The initial vertex has an in-degree equal to zero. We call a vertex  
 69 with out-degree equal to zero a *terminal vertex*. Each terminal vertex represents a *maximally*  
 70 *admissible* knapsack, that is, a subset of items with the property that no additional remaining  
 71 item could be added to the knapsack without violating the weight constraint. Note that the  
 72 set of terminal vertices contains the vertex representing the solution of the knapsack problem.  
 73 We consider all three graphs,  $G$ ,  $\bar{G}$  and  $\vec{G}$ , in the analysis of participants' attempts at solving  
 74 knapsack problems.

75 Let us consider the graph  $G = (V, E)$  of some instance of the 0-1 knapsack problem.  
 76 The economic value of each node is given by  $v_i$  for all  $i \in V$ . Let vertex  $i$  represent the  
 77 initial node (empty knapsack) and vertex  $s$  represent the solution vertex. The distance between  
 78 the two vertices  $\ell_G(i, s)$  is equal to number of items in the solution of the instance. We can  
 79 compute  $\ell_G(i, s)$  for all other vertices  $i \in G, i \neq s$ . Intuitively, for any  $i \in G, i \neq s$ ,  $\ell_G(i, s)$   
 80 equals the number of additions of items to and removals of items from the knapsack to get from  
 81 the knapsack represented by vertex  $i$  to the solution of the instance, represented by vertex  $s$ .  
 82 The mean correlation between vertex values  $v$  and their distances to the solution vertex  $\ell_G$  in  
 83 the instances investigated in this study was  $-0.22$  (min =  $-0.41$ , max =  $0.04$ , SD =  $0.13$ ;

84 Tab. S2). Note that in convex problems this correlation would be positive. The low correlation  
85 between values and distances of vertices is one aspect of the knapsack problem that makes it  
86 hard. It means that optimisation algorithms based on local increase in marginal value such as  
87 hill-climbing do not work for the knapsack problem in general.

88 To illustrate this property, we plot the graphs of the instances investigated in this study in  
89 value-item (distance) space (Fig. S1). The position of each node in the graph of an instance  
90 is determined by its value (normalised by the value of the solution; abscissa) and distance  
91 (ordinate). The initial node is indicated in yellow and the solution node is indicated in red (top-  
92 right corner). As the plots illustrate, in each of the instances, there are many vertices of equal  
93 value but different distances, and vice versa.

### 94 **1.3 Computational approaches to solving the 0-1 knapsack problem**

95 Various algorithms have been proposed for the 0-1 knapsack problem. An algorithm is a tool  
96 for solving a well-specified computational problem [8]. It describes a specified computational  
97 procedure for achieving a desired relation between one set of values (input) and another set of  
98 values (output) that provides the solution to the computational problem. While every algorithm  
99 solves a particular computational problem, a given computational problem can often be solved  
100 by many different algorithms. This has led to the proposition that computational problems can  
101 be investigated separately from the algorithms that are used for solving these problems, that is,  
102 that the computational layer and the algorithmic layer are independent [9]. More recently, it  
103 has been suggested that computational and algorithmic layers are often interdependent and that  
104 therefore the study of the algorithmic layer can often provide important insights into the nature  
105 of the computational problem. This is also relevant for economics because the discipline has  
106 traditionally focused on the characterisation of the computational problems agents solve and  
107 ignored the way in which agents solve these problems. We propose that studying the search  
108 algorithms that humans may have used may give us important clues about the optimisation  
109 problem they were trying to solve.

110 Two classes of algorithms for the 0-1 knapsack problem can be distinguished: *uninformed*  
111 and *informed* search algorithms. Uninformed algorithms, such as breadth-first or depth-first  
112 search [10], typically search the entire graph of an instance to find the solution. Alternatively,  
113 the solution of an instance represented by graph  $\bar{G}$  can also be found by computing the longest  
114 path in  $\bar{G}$  [7]. Both running time and memory requirements of those algorithms increase non-  
115 polynomially in the size of the problem.

116 Informed search algorithms use some rule, sometimes referred to as *heuristic* [11], to guide  
117 the search. Instances of the 0-1 knapsack problem can be solved by dynamic programming  
118 [2]. Here, the time to compute the solution of a given instance is proportional to the *input*  
119 *size* of the problem given by  $I \log_2 C$ , where  $I$  is the number of items in the instance and  $C$   
120 is the capacity (weight limit) of the knapsack. Running time and memory requirements of  
121 the dynamic programming algorithm still increases fast in the size of the problem and hence  
122 computation quickly becomes intractable.

123 Given the computational intractability of these approaches, various *approximation algo-*  
124 *rithms* have been developed for the knapsack problem. One important approximation algorithm  
125 is the *greedy algorithm* [8]. It solves the knapsack problem by selecting items according to  
126 decreasing *density* of the items, where density is defined as the ratio of value to weight of an  
127 item. The greedy algorithm has much lower computational demands than dynamic program-  
128 ming. It only requires sorting of the items. However, it is not guaranteed to find the solution of  
129 an instance and its proposed solution may be arbitrarily far away from the solution. Note that  
130 the greedy algorithm always finds the optimum in a variation of the instance in which fractions  
131 of items are allowed, that is,  $w_i \in [0, 1], i = 1, \dots, I$  (LP-relaxation of the instance). The value  
132 of the solution in this modified problem (LP-bound) is often used as an approximation of the  
133 value of the solution in the 0-1 knapsack problem.

134 Another important type of algorithm is the *branch-and-bound* algorithm [12]. This algo-  
135 rithm starts with the greedy algorithm to construct an initial attempt and subsequently optimises  
136 the knapsack by selectively removing and adding items until a termination criterion has been

137 reached. Like the greedy algorithm, the branch-and-bound algorithm is not guaranteed to find  
138 the solutions of all instances of the 0-1 knapsack problem.

139 We also consider the *Sahni-k* algorithm [13]. The Sahni algorithm of order  $k$  considers a  
140 subset of  $k$  items and fills the knapsack using the greedy algorithm. It does so for all possible  
141 combinations of  $k$  items. The proposed solution is the knapsack with the highest total value.  
142 Note that the Sahni algorithm of order zero is equal to the greedy algorithm. If  $k$  is equal to the  
143 number of items in the solution of the instance, then the algorithm is equivalent to a brute force  
144 search and the solution proposed by the algorithm will be the solution of the instance. However,  
145 if  $k$  is less than the number of items in the solution, then the Sahni algorithm is not guaranteed  
146 to find the solution of the instance.

#### 147 **1.4 Example instance of the 0-1 knapsack problem**

148 We briefly discuss a small example instance of the 0-1 knapsack problem to illustrate the con-  
149 cepts discussed above. The properties of the instance are displayed in Fig. 1. There are five  
150 items available and the capacity of the knapsack is 7. Thus, the number of possible combina-  
151 tions of items is  $2^5 = 32$  but only 18 combinations are feasible, that is, they meet the weight  
152 constraint. The solution is the set (1, 3) with total value 21 and weight 7.

153 At the bottom of the Fig. 1, the graph of the instance is displayed. The positions of vertices  
154 in the x-y plane are determined by their value (x-axis) and distance to the solution node (y-  
155 axis). The graph has 18 vertices, 31 edges connecting the vertices, and 7 terminal vertices (that  
156 is, maximally admissible sets). The empty set (initial vertex) is displayed in yellow and the  
157 solution vertex is displayed in red. The graph illustrates the low correlation between values  
158 and distance of the solution of the vertices. Some of the vertices have similar values but are at  
159 different distances to the solution, whereas other vertices have the same distance to the solution  
160 but different values.

161 As is typical of the 0-1 knapsack problem, some of the approximation algorithms would  
162 not find the solution of the instance. For example, the greedy algorithm would select items in

163 decreasing order of their value-to-weight ratio and end up with set (1, 2, 4) with total value 20  
164 and weight 7.

## 165 **1.5 Measuring difficulty of an instance**

166 In computer science, problems are classified according to computational complexity. It is based  
167 on the resources required to solve the problem, irrespective of the algorithm used. The prob-  
168 lem of finding the solution of the 0-1 knapsack problem is a member of the complexity class  
169 NP-hard [2]. We refer to this problem as the *search problem*. Membership of the class NP-hard  
170 means there is no known algorithm for finding solutions of instances (i.e., algorithms that solve  
171 the search problem) with the properties that the solution is correct and the running time of the  
172 algorithm is a polynomial of the instance's size (function of the instance's capacity and num-  
173 ber of items). The members of class NP-hard are among the hardest computational problems  
174 currently known. The associated decision problem of determining whether a candidate solu-  
175 tion is the optimal solution of an instance, is a member of the complexity class NP-complete  
176 [2]. Membership of a complexity class is based on the hardest instances of a problem, that is,  
177 instances of a given problem may vary in difficulty.

178 Difficulty can also be expressed in terms of various measures of the topology of the graph  
179 induced by an instance. They include the number of vertices in the graph representing the  
180 problem (number of admissible sets) and the number of terminal vertices in the graph (number  
181 of maximally admissible sets). These measures can be regarded as properties of the search  
182 space through which brute-force search algorithms have to search in order to find the solution,  
183 and computational time and memory requirements of most algorithms increase with the size of  
184 the search space.

185 The 0-1 knapsack problem is a special case of the class NP-hard because its instances can  
186 be solved by dynamic programming. The computational time of the dynamic programming  
187 algorithm for the 0-1 knapsack problem is proportional to  $I \log_2 C$ , where  $I$  is the number of  
188 items available in the instance and  $C$  is the capacity of the knapsack. Hence, the problem



189 is said to be *pseudo-polynomial*. We will refer to  $I \log_2 C$  as the *input size* of the dynamic  
190 programming algorithm. It will be one of the measures of difficulty of instances.

191 Another measure of difficulty we consider here is based on the Sahni- $k$  algorithm de-  
192 scribed above [13, 14]. We define the  $k$  of a given instance as the smallest order of the Sahni- $k$   
193 algorithm that finds the exact solution of the instance. For example, an instance with  $k = 0$  is  
194 an instance that can be solved with the Sahni algorithm of order 0, that is, the problem can be  
195 solved by applying the greedy algorithm. The higher the  $k$  of an instance, the larger the distance  
196 of the instance's exact solution from the solution computed by the greedy solution. The higher  
197 the value of  $k$ , the higher are the number of computations and the memory requirement of the  
198 algorithm. The value of  $k$  of the instances considered in the present study ranges from 0 to 4  
199 (Tab. S2).

200 Another measure of difficulty of instances of the 0-1 knapsack problem is the Pearson cor-  
201 relation coefficient between values and weights of the available items [15]. Stronger correlation  
202 is associated with greater difficulty. In many real-life situations, value and weight are strongly  
203 correlated. For example, in many investment problems, the return is proportional to the in-  
204 vestment outlay plus a fixed charge for each project. If value and weight of items are strongly  
205 correlated, the instance is hard to solve for two reasons. Firstly, there is a large gap between  
206 the continuous (LP relaxation) and integer solution of the problem, and thus the problem is  
207 ill-conditioned. Secondly, sorting the items in decreasing order of their value-to-weight ratio  
208 means sorting according to their weights. This means, though, that for any small interval of the  
209 ordered items, there is only limited variation in weights, making it more difficult to satisfy the  
210 capacity constraint with equality [15].

211 Importantly, the measures of computational complexity described above are all defined  
212 relative to a Turing machine, a mathematical model of an idealised computing device. A Tur-  
213 ing machine can perform a large number of computations, can have access to large amounts  
214 of memory and can perform mathematical operations with perfect accuracy. Thus, even real-  
215 world computers are not Turing machines, as their memory is limited and so is the precision

216 of mathematical operations. An important question is to which extent the measures of com-  
217 putational complexity transfer to humans. We expect that many of the properties of instances  
218 that make them hard for a Turing machine (or a real-world computer) also make them hard  
219 for humans. For example, the input size is proportional to the amount of memory required by  
220 the dynamic programming algorithm. Since human working memory is constrained, we would  
221 expect instances to become more difficult for humans as memory requirements increase, albeit  
222 at a different rate. Similarly, the Sahni- $k$  measure is a measure of the size of a combinatorial  
223 problem that needs to be solved in order to find the solution of an instance. For humans to  
224 solve combinatorial problems, they require working memory and they need to perform arith-  
225 metic. Thus, we expect that humans will perform worse on instances that require more memory,  
226 that is, instances with higher input size and higher Sahni- $k$  measures, *ceteris paribus*. On the  
227 other hand, in instances with low Sahni- $k$ , most items are selected based on the greedy algo-  
228 rithm, which requires sorting according to the value-to-weight ratio. Since humans are prone to  
229 mathematical mistakes, we expect them to perform worse on instances with a high correlation  
230 between values and weights of items, *ceteris paribus*.

## 231 **1.6 Participants and experimental task**

232 Twenty human volunteers (age range = 18–30, mean age = 21.9, 10 female, 10 male), recruited  
233 from the general population, took part in the study. Inclusion criteria were based on age (min-  
234 imum = 18 years, maximum = 35 years), right-handedness and normal or corrected-to-normal  
235 vision. The experimental protocol was approved by The University of Melbourne Human Re-  
236 search Ethics Committee (Ethics ID 1443290), and written informed consent was obtained from  
237 all participants prior to commencement of the experimental sessions.

238 Participants were asked to solve eight instances of the 0-1 knapsack problem [2]. For  
239 each instance, participants had to select from a set of items of given values and weights, the  
240 subset of items with the highest total value, subject to a total weight constraint (Table S1). The  
241 instances used in this study were used in a prior study [14] and differed significantly in their

242 computational complexity (Table S2).

243 The instances were displayed on a computer display (1000 x 720 pixels; Fig. 1b). Each  
244 item was represented by a square. Value and weight of an item were displayed at the centre of  
245 the square. The size of an item was proportional to its weight and the colour (share of blue)  
246 was proportional to its value. At the top of the screen, total value, total weight and weight  
247 constraint of the knapsack were displayed. When the mouse was moved over an item, a black  
248 frame around the square appeared and the counters at the top of the screen added this items'  
249 value and weight to the totals. When the mouse was moved over an item that could not be added  
250 to the knapsack at that time, because its addition would have violated the weight constraint, the  
251 counters turned red. An item was selected into the knapsack by clicking on it. Once an item  
252 was selected into the knapsack, it turned green. The item stayed green until it was removed  
253 from the knapsack (by clicking on it again). A solution was submitted by pressing the space  
254 bar. An attempt was automatically terminated after 240 s and time remaining was displayed by  
255 a progress bar in the top-right corner of the screen.

256 Each participant had two attempts per instance. The order of instances was randomised  
257 across an experimental session. We recorded the time course of selection of items to and re-  
258 movals from the knapsack. To make the task incentive compatible, participants received a pay-  
259 ment proportional to the values of their attempts (between \$0 and \$4 per attempt). In addition,  
260 participants received a show-up fee of \$5.

## 261 **1.7 Data analysis**

262 For each attempt, we recorded the sequence of additions of items to and removals of items from  
263 the knapsack. Each element in this sequence represents a state of the knapsack, and each state  
264 of the knapsack corresponds to a vertex in the graph  $G$  of the instance (the first element of the  
265 sequence always corresponds to the initial vertex of  $G$ , and the last element always corresponds  
266 to the participant's proposed solution of the instance). A sequence of additions and removals  
267 can be represented as a path in the graph (Supplementary Methods 1.2).

268 For each attempt, we recorded the time when the attempt was submitted as well as the  
269 sequence of additions and removals of items. For each step in this sequence, we computed  
270 the total value of items selected as well as the distance  $\ell_G(i, s)$  to the solution vertex  $s$  from  
271 the vertex  $i$  in the graph representing this subset of items (Supplementary Methods 1.2). The  
272 subset of items selected at the time of submission was the participant’s proposed solution of the  
273 instance. The attempt was marked correct if the subset of items in the participant’s proposed  
274 solution was the solution of the instance (that is,  $\ell_G(i, s)$  was equal to zero), and incorrect  
275 otherwise.

276 To evaluate an attempt in value space, we computed the value of the proposed solution  
277 normalised by the value of the solution, which corresponds to the reward schedule. We also  
278 computed the difference between the proposed solution and the mean of the values of all termi-  
279 nal vertices in the graph representing the problem. The latter is the mean of the values of all  
280 maximally admissible knapsacks, which is equal to the expected value of randomly selecting  
281 items into the knapsack until the knapsack is full.

282 All analyses were performed in Python (version 2.7.6) and R (version 3.2.0).

## 283 **2 Supplementary Results**

### 284 **2.1 Duration of attempts**

285 In the following, we will only consider attempts that were submitted within the time limit of  
286 240 s. Of all 320 attempts in the experiment, 12 were not submitted within the limit, leaving  
287 308 attempts for analysis. The mean time spent on an attempt was 172.0 s (SD = 57.1). Means  
288 of instances (min = 146.5 s, M = 172.3 s, max = 193.7 s, SD = 15.7 s) were not significantly  
289 different (one-way ANOVA,  $F(1, 6) = 5.2$ ,  $P = 0.06$ ). We also fitted survival functions  
290 separately for each instance. We found that survival times differed significantly across instances  
291 (log-rank test,  $\chi^2(7) = 14.9$ ,  $P < 0.05$ ). Participant means (min = 73.4 s, M = 172.5 s, max  
292 = 226.7 s, SD = 39.8 s) were not significantly different from each other (one-way ANOVA,

293  $F(1, 18) = 0.13, P > 0.05$ ) but survival times differed significantly across participants (log-  
294 rank test,  $\chi^2(19) = 303, P < 0.001$ ).

## 295 **2.2 Quality of attempts**

296 *Success rates:* The mean success rate, that is the proportion of attempts in which participants  
297 found the solution of an instance, was 37.4% (SD = 48.3%). In comparison, the expected  
298 success rate of an algorithm that fills knapsacks by picking items at random, which is equivalent  
299 to picking a maximally feasible knapsack at random, was 0.7%. The total number of successes  
300 was significantly above chance (one-sided binomial test,  $P < 0.001$ ). The success rate varied  
301 substantially by both problem instance (min = 2.7%, M = 36.7%, max = 74.4%, SD = 19.3%;  
302 Fig. 2a) and participant (min = 6.2%, M = 37.4%, max = 56.2%, SD = 15.7%; Fig. 2b). One of  
303 the instances was only solved once and the participant who solved it had an overall success rate  
304 of 50.0% (there were 5 participants with higher average success rates). Note that performance  
305 varied more between problems (range = 71.7%) than between participants (range = 50.0%).

306 *Distance:* A refined measure of the quality of an attempt is the distance  $\ell_G$  of an attempt from  
307 the solution in the graph  $G$  induced by the instance (Supplementary Methods 1.2). The mean  
308 distance was 2.639 (SD = 2.325). It was significantly lower than the mean distance of attempts  
309 of an algorithm filling the knapsack by picking items at random, which was 5.068 (one-sample  
310 t-test,  $t(307) = -18.374, P < 0.001$ ). Distance, too, varied significantly by both instance (min  
311 = 0.784, M = 2.622, max = 4.865, SD = 1.170) and participant (min = 1.429, M = 2.595, max =  
312 4.062, SD = 0.765).

313 *Economic value:* To assess economic performance, we computed the value of a participant's  
314 attempt and normalised it by the value of the solution. Mean economic performance was 97.4%  
315 (SD = 5.8%). It was significantly higher than the expected economic performance of an al-  
316 gorithm that fills knapsacks by randomly picking items until the knapsack is full, which was  
317 85.3% (one-sample t-test,  $t(307) = 36.382, P < 0.001$ ). Similar to the previous performance  
318 measures, economic performance varied more by instance (min = 95.8%, M = 97.4%, max =

319 99.0%, SD = 1.1%) than by participant (min = 88.9%, M = 97.4%, max = 99.3%, SD = 2.4%).

320 A stricter benchmark to assess economic performance is the difference between the value  
321 of the solution of an instance and the expected value of a knapsack filled by randomly selecting  
322 items, normalised by the latter. It is a measure of economic performance relative to a random  
323 (skill-less) algorithm. The mean value of this shortfall measure was 79.7% (SD = 35.0%). This  
324 measure, too, varied significantly by both instance (min = 69.7%, M = 79.6%, max = 89.4%, SD  
325 = 6.2%) and participant (min = 36.4%, M = 79.8%, max = 94.3%, SD = 13.5%). The fact that  
326 this measure is significantly above 0 (one-sample t-test,  $t(307) = 39.893$ ,  $P < 0.001$ ) is another  
327 indication that human participants performed better than a skill-less (random) algorithm.

### 328 **2.3 Effort and performance**

329 Next, we examined the relation between effort and performance in more detail. One measure of  
330 effort spent on an instance is the number of additions of items to and removals from the knap-  
331 sack, which we refer to as the length of the search path in the graph induced by the instance  
332 (Supplementary Methods 1.2). This number can be considered as a proxy of the number of com-  
333 putations performed by the participant during an attempt, that is, a measure of computational  
334 time (analogous to *CPU time* in computing). There was no relation between computational per-  
335 formance and path length ( $P > 0.05$ , main effect of path length, generalised linear mixed model  
336 (GLMM) with participant random effects on intercept and main effect of path length; Tab. S3  
337 Model 1). We found a positive relation between path length and economic performance, mea-  
338 sured as the value of an attempt normalised by the value of the optimal solution ( $P < 0.05$ , main  
339 effect of path length, linear mixed model (LMM) with participant random effects on intercept  
340 and main effect of path length; Tab. S3 Model 3).

341 Another measure of effort spent on an instance is clock time. There was no relation be-  
342 tween clock time spent on an instance and computational performance ( $P > 0.05$ , main effect  
343 of clock time, GLMM with instance and participant random effects on intercept and main effect  
344 of clock time,  $P > 0.05$ ; Tab. S3 Model 2) but a positive relation between time spent on an

345 attempt and economic performance ( $P < 0.05$ , LMM with participant random effects on inter-  
346 cept and main effect of clock time; Tab. S3 Model 4). Participants who spent more time on an  
347 instance achieved higher values.

348 These results suggest that participants may have allocated resources (clock time and com-  
349 putational time on task) according to value. We investigated this notion in more detail. Homo  
350 economicus would be expected to keep spending effort on an attempt while marginal gain from  
351 effort is larger than marginal cost of effort. Thus, we would expect participants to keep work-  
352 ing on an attempt as long as the marginal gain per unit of time is larger than the cost of effort  
353 (which we assumed to be positive and constant). To investigate whether this was the case, we  
354 computed marginal gain from effort per unit of clock time for each attempt and averaged across  
355 all attempts. We found that that mean marginal gain per unit of clock time dropped to zero at  
356 about 60 s and remained at zero for the remainder of time on task ( Fig. S2a). Given that the  
357 mean time on task was 172.0 s, as a group participants spent more than two thirds of their time  
358 on attempts at zero marginal gain. Indeed, if we assume that marginal cost of effort was strictly  
359 positive, as a group participants spent most of the time on task at a marginal net loss. The same  
360 pattern emerges when considering computational time instead of clock time (Figs. 3c and S2c).

361 We also examined how the quality of an attempt improved in item space. To this end,  
362 we computed the differences in distances  $\ell_G$  to the solution between subsequent vertices in the  
363 path, which is equal to the gain in distance  $\ell_G$  between two vertices, and examined the time  
364 course of gains. The mean gain reached zero after about seven steps (Fig. S2d) or about 70 s  
365 (Fig. S2b). This means that on average, the gains in quality of attempts were achieved in the  
366 first few steps of an attempt, after which the average gain was zero. We conclude that the gains  
367 in quality in attempts in both item and value space appeared in the first third to quarter of an  
368 attempt, after which gains in quality remained around zero on average.

369 In summary, more time spent on an attempt was associated with a higher economic perfor-  
370 mance in the attempt, but it was not associated with a higher computational performance. We  
371 now turn to the question of what determined computational performance.

## 372 **2.4 Computational performance vs. economic performance**

373 In the next step, we examined the relation between computational performance and economic  
374 performance. To this end, we compared success rates and economic values of attempts across  
375 instances. *Homo economicus* exerts effort until the marginal gain from effort is equal to the  
376 marginal cost of effort. The mean success rate can be interpreted as an index of difficulty of  
377 an instance. Assuming that marginal cost of effort is strictly positive and constant, we would  
378 expect a positive relation between computational performance and economic performance on  
379 average. That is, we would expect participants to make more money in instances with higher  
380 success rates (easy instances). However, we found the opposite to be the case: The mean value  
381 of attempts of an instance was negatively correlated with the mean success rate for the instance,  
382 that is, participants generated less value in easy instances compared to difficult instances (Pear-  
383 son correlation  $r = -0.838$ ,  $P < 0.01$ ; Fig. 3d). This means that participants on average made  
384 more money on difficult instances. Note that for a given instance, correct attempts will always  
385 be worth more than incorrect attempts. The same applies for a given participant.

## 386 **2.5 Variation in computational performance**

387 We found significant variation in success rates (computational performance) across instances  
388 and also that success did not vary with time spent on those instances (Supplementary Re-  
389 sults 2.3). We then investigated whether success in instances was related to instance properties,  
390 in particular various measures of their computational complexity and graph topology.

391 We first examined the relation between success and various measures of the size of the  
392 instances. Computational complexity is typically defined in terms of the size of an instance,  
393 which in case of the knapsack problem, is given by the number of items. We found that com-  
394 putational performance decreased in the number of items in an instance, that is, instances with  
395 more items were more difficult ( $P < 0.001$ , main effect of number of items, GLMM with  
396 with random effects on intercept for individual participants and main effect of number of items;



397 Tab. S4 Model 1). Computational performance was also negatively related to the number of  
398 vertices in the instance graph ( $P < 0.001$ , main GLMM with participant random effects on in-  
399 tercept and main effect of number of vertices; Tab. S4 Model 2, Fig. 4a). It was also negatively  
400 correlated with the number of terminal vertices at the level of individual attempts ( $P < 0.01$ ,  
401 main effect of number of terminal vertices, GLMM with participant random effects on intercept  
402 with main effect of number of terminal vertices, Tab. S4 Model 3).

403 Next, we examined the relation between computational performance and computational  
404 complexity of the instance. Computational performance was not related to input size ( $P > 0.05$ ,  
405 GLMM with participant random effects on intercept and main effect of input size; Tab. S4  
406 Model 4). However, we found that computational performance was negatively related to Sahni-  
407  $k$  ( $P < 0.001$ , main effect of Sahni- $k$ , GLMM with participant random effects on intercept  
408 and main effect of Sahni- $k$ ; Tab. S4 Model 5, Fig. 4b). The success rate of the instance with  
409  $k = 0$ , that is, the instance that could be solved with the greedy algorithm, was 74.4% whereas  
410 the success rate for the instance with the highest  $k$  ( $k = 4$ ) was 2.7%. This suggests that  
411 there was a negative relation between computational complexity of the instances and success  
412 rate. We also found a negative relation between between computational performance and the  
413 Pearson correlation of item values and weights ( $P < 0.05$ , main effect of correlation between  
414 values and weights, GLMM with participant random effects on intercept and main effect of  
415 Pearson correlation between values and weights; Tab. S4 Model 6, Fig. 4c) but the value-  
416 weight correlation could not explain variation in performance that was not captured by Sahni- $k$   
417 ( $P > 0.05$ , interaction Sahni- $k \times$  Pearson correlation, GLMM with participant random effects  
418 on intercept, main effects for Sahni- $k$  and Pearson correlation between values and weights, and  
419 interaction Sahni- $k \times$  Pearson correlation; Tab. S4 Model 7).

420 These results suggest that computational performance in the instances was strongly related  
421 to certain measures of the size of the search problem induced by the instance (size of the search  
422 space) as well as computational complexity of the instance. They provide indications of what  
423 search strategies or algorithms participants may have used and where their searches for solutions

424 broke down.

## 425 **2.6 How did participants search?**

426 To examine participants' search strategies in more detail, we considered the search paths dur-  
427 ing individual attempts, that is, the sequence of additions of items to and removal from the  
428 knapsack. From this sequence we can reconstruct the state of the knapsack at any point in  
429 time, which can be mapped on the instance graph as a search path. The average number of  
430 steps (item additions/removals) in participants' search paths was 33.3 (SD = 22.1). During their  
431 search, participants visited 4.0 terminal vertices (maximally admissible knapsacks) on average.

432 First, we computed the proportion of vertices and terminal vertices in the graph induced by  
433 an instance that participants visited during their search. The mean proportion of unique vertices  
434 visited by participants was 3.6%, with significant variation across instances (min = 0.6%, max =  
435 7.6%, SD = 2.6%; Fig. 4a). As a group, they visited 42.1% of vertices of the instance graph on  
436 average (min = 10.2%, max = 74.8%, SD = 24.5%; Fig. 4b). This means that while individual  
437 participants only visited a very small proportion of the graph, as a group they visited a large part  
438 of it. This suggests that there was significant heterogeneity in search strategies. In addition, in  
439 all but one instance, at least one participant found the solution, which means that as a group,  
440 participants searched successfully whereas individually they did not. The mean proportion of  
441 vertices visited by participants was negatively correlated with the total number of vertices in  
442 the graph ( $r = -0.888$ ,  $P < 0.01$ ) and so was the proportion of vertices visited by the group  
443 ( $r = -0.870$ ,  $P < 0.01$ ).

444 We found a similar pattern for the proportion of unique terminal vertices visited by partic-  
445 ipants. The mean proportion of terminal vertices visited by participants was 4.6%, with signif-  
446 icant variation across instances (min = 0.8%, max = 10.6%, SD = 3.1%; Fig. 4c). As a group,  
447 they visited 52.1% of terminal vertices on average (min = 12.5%, max = 74.0%, SD = 20.7%;  
448 Fig. 4d). There was also a large degree of heterogeneity in the number of terminal vertices  
449 submitted at the end of an attempt. The mean number of unique terminal vertices submitted by

450 participants was 13.9 (min = 7, max = 30, SD = 7.4). The mean proportion of terminal vertices  
451 visited by participants was negatively correlated with the total number of terminal vertices in  
452 the graph ( $r = -0.861$ ,  $P < 0.01$ ) and so was the proportion of vertices visited by the group  
453 ( $r = -0.948$ ,  $P < 0.001$ ).

454 We conclude that while individual participants only explored a relatively small part of the  
455 search space, as a group they explored a large part of it. Computational performance was not  
456 related to the proportion of vertices visited by participants ( $P > 0.05$ , main effect of propor-  
457 tion of vertices visited, GLMM with participant random effects on intercept and main effect of  
458 proportion of vertices visited; Tab. S5 Model 1) but it was positively related to the proportion  
459 of terminal vertices visited ( $P < 0.05$ , main effect of proportion of terminal vertices visited,  
460 GLMM with participant random effects on intercept and main effect of proportion of terminal  
461 vertices visited; Tab. S5 Model 2). That is, the extent of search had a small effect of computa-  
462 tional performance but only with regards to terminal vertices.

463 We also investigated the relation between the extent of search and economic performance.  
464 There was no relation between economic performance and either the proportion of vertices or  
465 the proportion of terminal vertices visited ( $P > 0.05$ , main effects of proportion of (terminal)  
466 vertices visited, LMM with participant random effects on intercept and main effect of proportion  
467 of (terminal) vertices visited; Tab. S5 Models 3 and 4).

468 Next, we examined the *quality* of search. To do so, we compared the quality of the vertices  
469 visited to the average quality of the vertices in the graph. If participants picked vertices at  
470 random, then the quality of the vertices visited would be equal to the average quality of all  
471 vertices in the graph. First, we looked at the distance to the solution  $\ell_G$  of vertices visited  
472 (Supplementary Methods 1.2). For each attempt, we computed  $\ell_G$  of each of the vertices visited  
473 and computed the mean of those values. This gives us the mean of  $\ell_G$  of all vertices visited.  
474 From it we subtracted the mean of  $\ell_G$  of *all* vertices in the graph induced by the instance. The  
475 mean value of this difference was  $-1.230$ , which was significantly below zero (one-sample t-

476 test,  $t(307) = -17.461$ ,  $P < 0.001$ ). It implies that the quality of vertices visited by participants  
477 was significantly better than the average quality of vertices in the instances.

478 We found that the gains in quality of an attempt occurred mainly in the first stage of an  
479 attempt (Supplementary Results 2.3). To examine in more detail the notion that only the earlier  
480 but not the later stages of the search were beneficial, we considered the terminal vertices visited  
481 by participants during their attempts. More specifically, we compared the quality in item space  
482 of the first terminal vertex visited to the quality of the last terminal vertex visited. The first  
483 terminal vertex is the first full knapsack (set of items) a participant assembled and the last  
484 terminal vertex is the knapsack submitted. We measured quality of a vertex  $i$  by its distance  
485 to the solution vertex  $s$ ,  $\ell_G(i, s)$  (Supplementary Methods 1.2). The mean distance of the first  
486 terminal vertex visited to the solution vertex across instances was 3.699 (min = 2.526, max =  
487 5.350, SD = 0.876). In comparison, the mean number of items in the solution was 5.500 (min =  
488 3, max = 9, SD = 1.871). The mean distance of the last terminal vertex was 2.628 (min = 0.763,  
489 max = 4.800, SD = 1.163). This means that there was a greater improvement in quality between  
490 initial vertex and first terminal vertex than between first and last terminal vertex visited. In  
491 addition, the mean difference between the terminal vertices visited, that is  $\ell_G(i, j)$  where  $i$  and  
492  $j$  are two subsequent terminal vertices on the search path, was 1.809 (min = 1.593, max = 2.052,  
493 SD = 0.131). Note that participants visited about 4 terminal vertices on average. This means  
494 that the mean distance between the terminal vertices visited was higher than the reduction in  
495 distances to the solution between first terminal vertex to last terminal vertex. It suggests that  
496 many of the changes in the sets of items between first and last terminal vertex did not result in  
497 a reduction of the distance to the solution.

498 We also computed the proportion of participants that had visited the solution vertex for  
499 each step in the search path. This gives us, for each step in the search, the proportion of partic-  
500 ipants who visited the solution vertex by that step. The mean proportion of participants across  
501 instances who visited the solution vertex was 39.6% (min = 2.7%, max = 79.5%, SD = 20.6%),  
502 which is slightly higher than the mean success rate. The mean number of steps across instances

503 until the first participant visited the solution vertex was 7.2 (min = 4, max = 12, SD = 2.9;  
504 Fig. S5), compared to a mean number of steps in the search path of 33.3. Across instances,  
505 among all participants who visited the solution vertex, the mean number of steps to the first  
506 visit was 18.0 (min = 8.6, max = 35.9, SD = 8.1). This means that among those participants  
507 who visited the solution vertex, the first participant to visit tended to be substantially faster than  
508 the average, another sign of heterogeneity in search strategies. However, most participants who  
509 visited the solution vertex kept searching before they submitted their solution. The mean num-  
510 ber of steps between the first visit of the solution vertex and submission of the attempt was 21.1  
511 (min = 6.1, max = 26.2, SD = 17.0). In this period, many participants visited the solution vertex  
512 multiple times before they submitted an attempt. The mean number of visits across instances,  
513 among those participants who visited the solution vertex at least once, was 2.8 (min = 2.0, max  
514 = 5.1, SD = 0.9). In addition, in some of the instances the proportion of participants who visited  
515 the solution vertex was higher than the success rate in the instances (Fig. S5). This suggests  
516 that some of the participants visited the solution vertex but submitted another set of items in the  
517 attempt, a point probably related to the NP completeness property of knapsack problems, which  
518 we examine in more detail below (Supplementary Results 2.9).

## 519 **2.7 Which search algorithms did participants use?**

520 Performance data in combination with information about the search path allows certain in-  
521 ferences about the type of search algorithm participants may have used. The relatively low  
522 computational performance together with the short average length of the search path and small  
523 fraction of the instance graphs participants explored, suggests that participants did not use any  
524 of the uninformed, exhaustive search algorithms.

525 On the other hand, participants' computational performance was substantially higher than  
526 that of a random algorithm, suggesting that participants used an informed (rule- or heuristic-  
527 based) algorithm. The fact that performance was well below 100%, rules out dynamic pro-  
528 gramming. This conclusion is further supported by the absence of a relation between success

529 rate and input size of the problem (Supplementary Results 2.5). It is more likely that participants  
530 used some sort of approximation algorithm. The finding that success rates decreased with the  
531 Sahni- $k$  of instances suggests that participants were using an algorithm of low computational  
532 complexity (Supplementary Results 2.5). The relatively high success rate in instances with a  
533 Sahni- $k$  of 0 suggests that the algorithm used was similar to the greedy algorithm. To investigate  
534 this possibility in more detail, we examined the sequence of additions of items to and removals  
535 of items from the knapsack. For each instance, we ordered the items in the various instances in  
536 decreasing order of value-to-weight ratio and computed the frequencies with which the items at  
537 each rank were chosen in the various steps of participants' sequences. If all participants used the  
538 greedy algorithm, then the items with the highest value-to-weight ratio of each instance would  
539 have been chosen in the first step, the item with the second highest value-to-weight ratio would  
540 have been chosen in the second step, and so on.

541 We found that across all participants and all instances, the items with the highest value-  
542 to-weight ratios were chosen most often in the first few steps. For example, the three items  
543 with the highest value-to-weight ratio were chosen in 15.6% of cases in the first three steps on  
544 average, while the mean frequency for the next seven items was 6.8% (Fig. 4d). In addition, the  
545 frequencies with which the items were chosen decreased with the number of steps. The three  
546 items with the highest value-to-weight ratios were chosen in 9.4% of cases in steps four to 10  
547 on average, compared to 15.6% in the first three steps (Fig. 4d). These patterns were similar  
548 across all instances (Fig. S3). They suggest that participants selected the items with the highest  
549 value-to-weight ratios first when filling the knapsack, similar to the greedy algorithm. However,  
550 there was considerable variation in the order with which items were chosen, which suggests  
551 that participants either did not follow the greedy algorithm exactly or that not all participants  
552 followed the greedy algorithm.

553 Several other findings provide further support for the claim that participants did not use  
554 the greedy algorithm. Firstly, participants' performance was substantially higher than that of  
555 the greedy algorithm (it would only have found the solution in one of the instances whereas

556 participants solved 37.4% of instances on average). Secondly, the greedy algorithm fills the  
557 knapsack by selecting items into the knapsack in decreasing order of their value-to-weight ratio,  
558 until the knapsack is full. This means that the greedy algorithm would have terminated attempts  
559 after 6.6 steps on average. The average number of steps in participants' sequences (searches)  
560 was 33.3, however (SD = 22.1).

561 These results suggest that participants were more likely to have used an algorithm similar  
562 to branch-and-bound that starts the search by filling the knapsack with the greedy algorithm  
563 and then searches for improvements by systematically removing and adding items in search  
564 for higher value knapsacks. Since Sahni- $k$  is a measure of deviation of a solution from the  
565 greedy algorithm, we would expect that participants who tried to replace multiple items in the  
566 first full knapsack to be more successful, at least for instances where this was needed, that is,  
567 for high Sahni- $k$  instances. Therefore, we tested whether computational performance could be  
568 explained, not only by Sahni- $k$ , but also by the interaction between Sahni- $k$  and the number of  
569 items participants replaced on average after reaching the first full knapsack. We measured the  
570 latter as the length of the shortest path between two full knapsack attempts, that is, between two  
571 subsequent terminal vertices (Supplementary Methods 1.2). The interaction term was indeed  
572 significant ( $P < 0.01$ , GLMM with random effect for participants on intercept, main effect of  
573 Sahni- $k$  and mean distance, and interaction of Sahni- $k \times$  mean distance; Table S6). However,  
574 the fact that the values of the knapsacks did not increase over time for the last two thirds of  
575 participants' searches (Fig. S2a, S2c) suggests that participants did not use the branch-and-  
576 bound algorithm, at least not in its exact form. The high average length of sequences and the  
577 low average number of terminal vertices visited also suggests that participants did not use the  
578 Sahni algorithm.

## 579 **2.8 Path dependence in search**

580 Next, we investigated whether there was path dependence in the search paths. To this end,  
581 we examined the sequence of terminal vertices (maximally admissible knapsacks) visited by

582 participants during an attempt. First, we tested whether the distance  $\ell_G(i, s)$  of the first terminal  
583 vertex  $i$  to the solution  $s$  was predictive of the distance of the last terminal vertex. We estimated  
584 a LMM with distance of the last terminal vertex as dependent variable and distance of the first  
585 terminal vertex as independent variable, with random effects on intercept for participants. We  
586 found that the distance of the first terminal vertex was predictive of the distance of the last  
587 terminal vertex, and hence of success ( $P < 0.001$ , main effect of distance of first terminal  
588 vertex, LMM with participant random effects on intercept and main effect of distance of first  
589 terminal vertex; Tabel S7 Model 1). This suggests that quality of an attempt (distance of the  
590 last terminal vertex to the solution) was path-dependent. We also found that the change in  
591 distances between first and last terminal vertex was predictive of the distance of the last terminal  
592 node ( $P < 0.001$ , main effect of change in distance, LMM with participant random effects on  
593 intercept and main effect of change in distance; Table S7 Model 2), which means that the quality  
594 of the search increased the likelihood of success.

595 We examined the notion of path dependence further by investigating to what extent there  
596 was a tendency not to eliminate incorrect items that were added early on, and whether this  
597 determined computational performance. To this end, we considered the distribution of the age  
598 of incorrect items that were eventually deleted (Fig. 5). We defined age as a fraction of number  
599 of steps taken since the beginning of an attempt (age equals 1 if the item was the first added  
600 to the knapsack). Most deleted incorrect items were added very recently ( $M = 0.2920$ ,  $SE =$   
601  $0.0001$ ); only rarely did participants eliminate incorrect items that were added to the knapsack  
602 early on. A similar pattern emerged for correct items that were deleted ( $M = 0.2352$ ,  $SE =$   
603  $0.0001$ ; Fig. 5). Mean age of correct items was significantly higher than age of incorrect items  
604 (two-sample  $t$ -test,  $t = 6.98$ ,  $P < 0.001$ ) and their distributions were significantly different  
605 (Kolmogorov-Smirnov test for independence of samples,  $D = 0.10$ ,  $P < 0.001$ ).



## 606 2.9 Did participants solve the decision problem?

607 In the theory of computation, a distinction is made between search problems and decision prob-  
608 lems. The search problem is the problem of finding the optimal solution of an instance (also  
609 referred to as *optimisation problem*), whereas the decision problem is the problem of verify-  
610 ing that a candidate solution is the actual solution of an instance. In the case of the knapsack  
611 problem, the decision problem is 'Can a value of at least  $V$  be achieved without exceeding the  
612 weight  $C$ ?' The decision problem form of the knapsack problem is NP-complete, which im-  
613 plies that there is no known polynomial algorithm which can verify that the decision is true [2].  
614 Given that the decision problem is NP-complete, the search problem of the knapsack problem  
615 is NP-hard, that is, there is no polynomial algorithm for solving the optimisation problem [16].

616 So far, we have analysed the search problem of the KP. We now examine whether those  
617 participants who submitted the correct solution, had actually solved the decision problem, that  
618 is, whether they knew that the candidate solution they submitted was the solution of the problem.  
619 As reported in the previous section, those participants who visited the solution vertex at least  
620 once tended to visit it several times. This suggests that those participants did not know that they  
621 had found the solution, that is, they could had not solve the decision problem. A participant who  
622 was able to solve the decision problem would have known that the solution vertex is indeed  
623 the highest value vertex, and hence would have submitted this set of items in their attempt.  
624 Moreover, considering only those attempts in which the participant visited the solution vertex  
625 at least once, in 6.5% of cases the participant subsequently submitted another set of items (of  
626 inferior value). These participants definitely did not solve the decision problem.

627 We also examined how participants performed on subsequent attempts of the same in-  
628 stance. Every participant attempted the same instance twice, with one attempt immediately  
629 following the other. A participant who solved the decision problem would be expected to re-  
630 member the solution and therefore also solve the second attempt. Thus, we computed the num-  
631 ber of times participants solved the first attempt of the same instance or the second or both. The

632 percentage of participant  $\times$  instance pairs in which participants found the solution in at least  
633 one attempt was 51.0%. In 22.9% of cases, participants solved both the first and the second  
634 attempt. In 17.6% of cases, they only solved the second attempt, and in 10.4% of cases they  
635 only solved the first attempt. Success in first and second attempt was not independent ( $\chi^2$  test,  
636  $\chi^2(2, 153) = 23.3, P < 0.001$ ). We would expect the number of successful second attempts to  
637 be higher than the number of successful first attempts, as participants had already explored part  
638 of the search space. However, we would not expect there to be any cases in which a participant  
639 solved an instance in the first attempt but not in the second attempt. The fact that of all partic-  
640 ipants who solved instances at least once, 20.5% only solved the instance in the first attempt  
641 but not in the second attempt, which indicates that those participants did not solve the decision  
642 problem, that is, they did not know that they had found the solution.

## 643 Supplementary References

- 644 1. Mathews, G. B. On the partition of numbers. *Proceedings of the London Mathematical Society* **28**, 486–490  
645 (1897).
- 646 2. Kellerer, H., Pferschy, U. & Pisinger, D. *Knapsack Problems* (Springer Science & Business Media, 2004).
- 647 3. Arora, S. & Barak, B. *Computational Complexity: A Modern Approach* (Cambridge University Press,  
648 Cambridge, 2010).
- 649 4. Fortnow, L. The status of the P versus NP problem. *Communications of the ACM* **52**, 78–86 (Sept. 2009).
- 650 5. Diestel, R. *Graph Theory* (Springer, 2006).
- 651 6. Navarro, G. A guided tour to approximate string matching. *ACM Computing Surveys* **33**, 31–88 (2001).
- 652 7. Dasgupta, S., Papadimitriou, C. & Vazirani, U. *Algorithms* (McGraw-Hill, New York, NY, 2006).
- 653 8. Cormen, T. H., Leiserson, C., Rivest, R. L. & Stein, C. *Introduction to Algorithms* (MIT Press, Cambridge,  
654 MA, 2001).
- 655 9. Marr, D. *Vision* (W.H. Freeman, San Francisco, 1982).
- 656 10. Russell, S. & Norvig, P. *Artificial Intelligence* (Pearson, Harlow, 2014).
- 657 11. Newell, A. & Simon, H. *Human Problem Solving* (Prentice-Hall, Englewood Cliffs, 1972).
- 658 12. Land, A. H. & Doig, A. An Automatic Method for Solving Discrete Optimization Problems. *Econometrica*  
659 **28**, 497–520 (1960).
- 660 13. Sahni, S. Approximate algorithms for the 0-1 knapsack problem. *Journal of the ACM* **22**, 115–124 (1975).
- 661 14. Meloso, D., Copic, J. & Bossaerts, P. Promoting intellectual discovery: patents versus markets. *Science* **323**,  
662 1335–1339 (2009).
- 663 15. Pisinger, D. Where are the hard knapsack problems? *Computers & Operations Research* **32**, 2271–2284  
664 (2004).
- 665 16. Moore, C. & Mertens, S. *The Nature of Computation* (Oxford University Press, Oxford, 2011).

666 **3 Supplementary Figures**

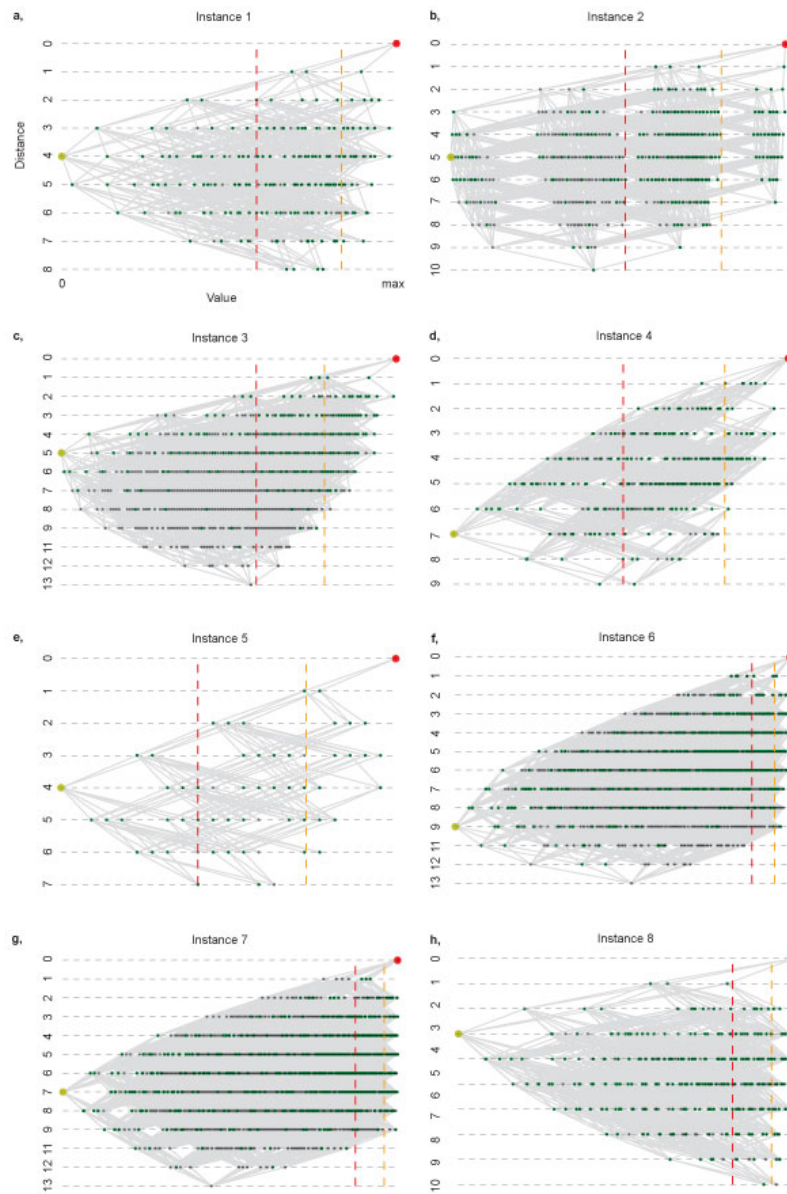

**Figure S1. Instance graphs for each instance in the task. a–h,** Graph induced by the instance (Supplementary Methods 1.2). Each vertex represents an admissible set of items. The initial vertex (empty set) is coloured in yellow and the solution vertex is coloured in red. Two vertices are connected by an edge if one vertex can be reached from the other by adding or removing one item. The position of a vertex on the abscissa is determined by the total value of the set of items represented by the vertex. The position of a vertex on the ordinate is determined by the distance  $\ell_G$  (shortest path length) of the vertex to the solution vertex. The red dashed line indicates the lowest value of any terminal vertex and the yellow dashed line indicates the mean value of all terminal vertices. The vertices by participants during their attempts are coloured in green. The set of available items in each instance is provided in Table S1 and some key properties of the instance graphs are provided in Table S2.

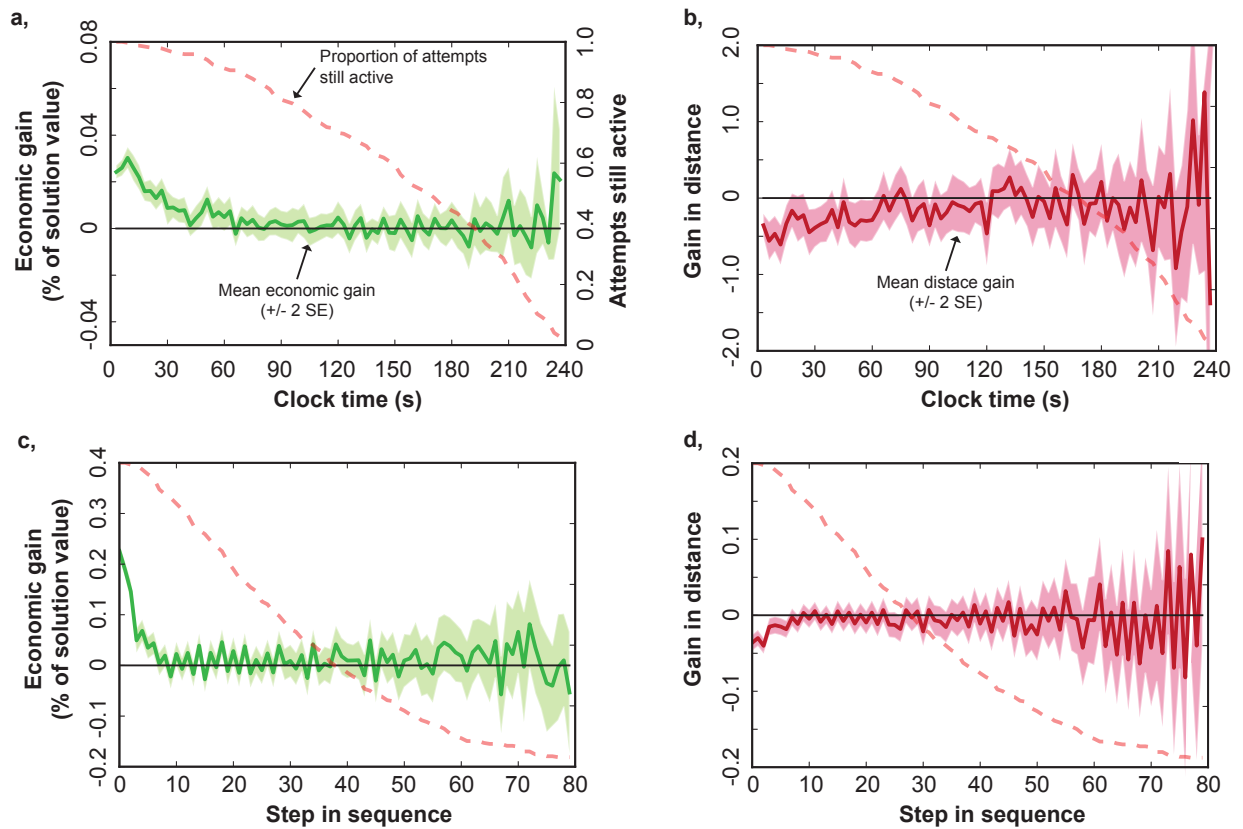

**Figure S2. Time courses of value gain and distance gain.** **a**, Time course of mean value gain per unit of clock time. The mean was computed over all attempts. **b**, Time course of distance gain per unit of clock time. The plot shows that mean change in distances  $\ell_G$  per unit of clock time (Supplementary Methods 1.2). **c**, Time course of mean value gain per sequence step. **d**, Time course of distance gain per sequence step.

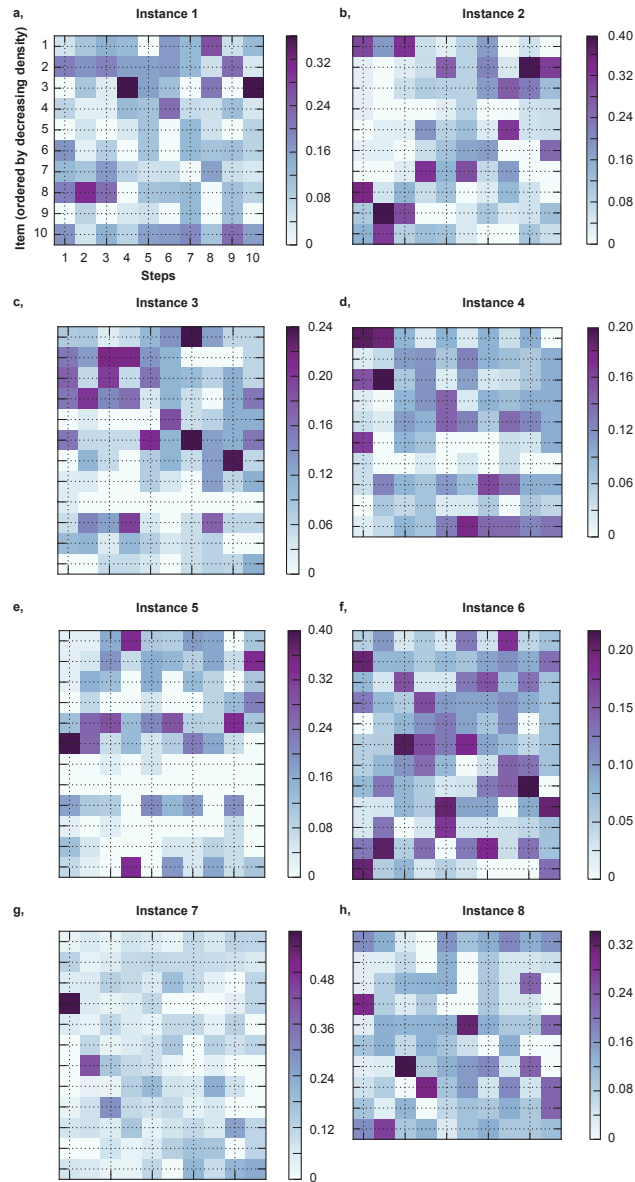

**Figure S3. Time courses of choice frequencies for individual items. a–h,** The items available in an instance were sorted in reverse order of their density (value-to-weight ratio). The heat map shows choice frequencies for the items for the first 11 steps in the search path (Supplementary Methods 1.2). If the greedy algorithm was used, off-diagonal entries would be zero.

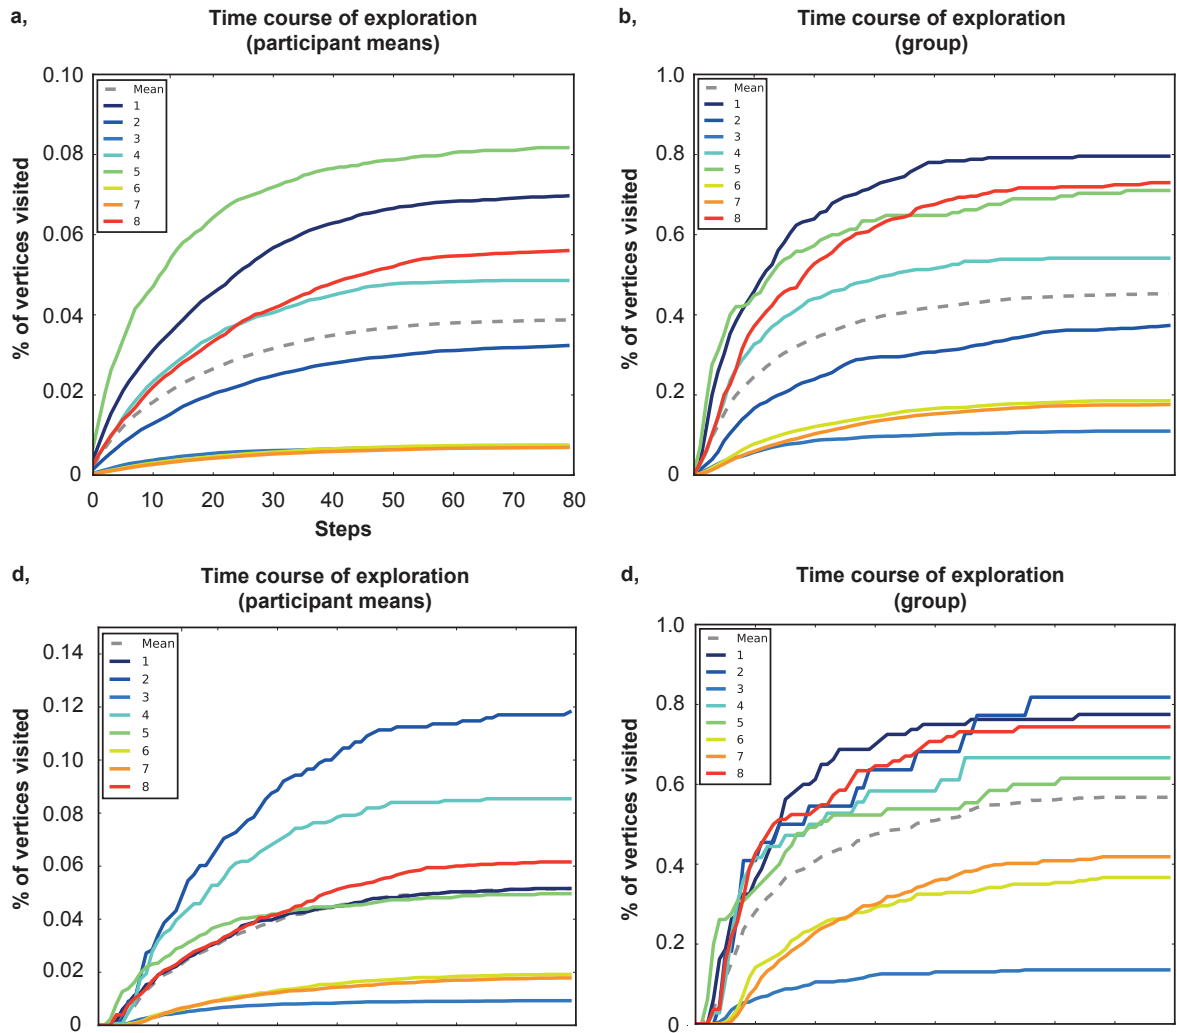

**Figure S4. Time courses of exploration.** **a**, Proportion of vertices visited by individual participants in each of the instances. The lines represent the mean of participant values in each of the instance. **b**, Proportion of vertices visited by all participants. The lines represent the proportion of vertices represented by the set of vertices visited by all participants at a particular step. **c**, Proportion of terminal vertices visited by individual participants in each of the instances. **d**, Proportion of terminal vertices visited by all participants.



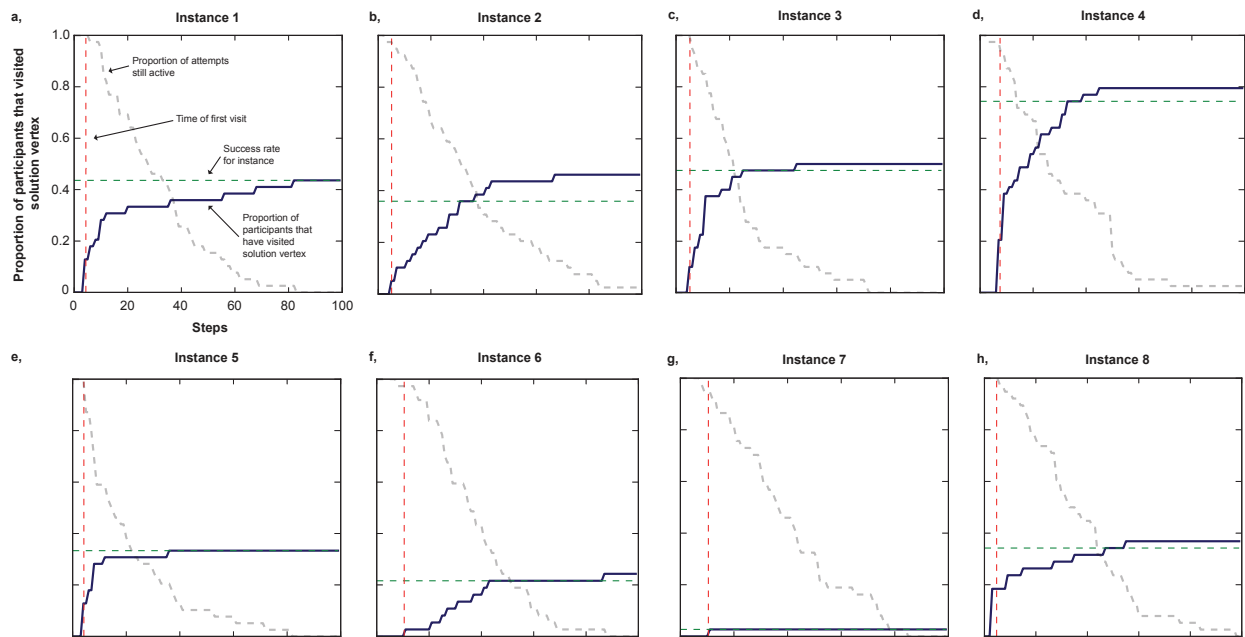

**Figure S5. Time courses of solution vertex visits. a–h,** The solid blue line shows the proportion of participants who have visited the solution vertex at a particular step during the attempt. The red dashed line indicates the step number at which the first participant visited the solution vertex. The green dashed line indicates the proportion of participants whose attempt was correct, that is, whose final set of items selected was identical to the set of items in the solution.

## 4 Supplementary Tables

**Table S1.** Available items and capacity (maximum weight) for each of the instances used in the experiment. Density is defined as the ratio of value to weight.

|                        |              |      |      |      |      |      |      |      |      |      |      |      |
|------------------------|--------------|------|------|------|------|------|------|------|------|------|------|------|
| <b>Instance 1</b>      | <b>Items</b> |      |      |      |      |      |      |      |      |      |      |      |
| <i>Capacity: 1,900</i> | 1            | 2    | 3    | 4    | 5    | 6    | 7    | 8    | 9    | 10   |      |      |
| Value                  | 500          | 350  | 505  | 505  | 640  | 435  | 465  | 50   | 220  | 170  |      |      |
| Weight                 | 750          | 406  | 564  | 595  | 803  | 489  | 641  | 177  | 330  | 252  |      |      |
| Density                | 0.67         | 0.86 | 0.90 | 0.85 | 0.80 | 0.89 | 0.73 | 0.28 | 0.67 | 0.67 |      |      |
| <b>Instance 2</b>      |              |      |      |      |      |      |      |      |      |      |      |      |
|                        | <b>Items</b> |      |      |      |      |      |      |      |      |      |      |      |
| <i>Capacity: 1,044</i> | 1            | 2    | 3    | 4    | 5    | 6    | 7    | 8    | 9    | 10   |      |      |
| Value                  | 300          | 350  | 400  | 450  | 47   | 20   | 8    | 70   | 5    | 5    |      |      |
| Weight                 | 205          | 252  | 352  | 447  | 114  | 50   | 28   | 251  | 19   | 20   |      |      |
| Density                | 1.46         | 1.39 | 1.14 | 1.01 | 0.41 | 0.40 | 0.29 | 0.28 | 0.26 | 0.25 |      |      |
| <b>Instance 3</b>      |              |      |      |      |      |      |      |      |      |      |      |      |
|                        | <b>Items</b> |      |      |      |      |      |      |      |      |      |      |      |
| <i>Capacity: 850</i>   | 1            | 2    | 3    | 4    | 5    | 6    | 7    | 8    | 9    | 10   | 11   | 12   |
| Value                  | 15           | 14   | 3    | 3    | 10   | 9    | 28   | 28   | 31   | 25   | 24   | 1    |
| Weight                 | 129          | 144  | 77   | 77   | 66   | 60   | 184  | 184  | 229  | 184  | 219  | 72   |
| Density                | 0.12         | 0.10 | 0.04 | 0.04 | 0.15 | 0.15 | 0.15 | 0.15 | 0.14 | 0.14 | 0.11 | 0.01 |
| <b>Instance 4</b>      |              |      |      |      |      |      |      |      |      |      |      |      |
|                        | <b>Items</b> |      |      |      |      |      |      |      |      |      |      |      |
| <i>Capacity: 1,500</i> | 1            | 2    | 3    | 4    | 5    | 6    | 7    | 8    | 9    | 10   |      |      |
| Value                  | 37           | 72   | 106  | 32   | 45   | 71   | 23   | 44   | 85   | 62   |      |      |
| Weight                 | 50           | 820  | 700  | 46   | 220  | 530  | 107  | 180  | 435  | 360  |      |      |
| Density                | 0.74         | 0.09 | 0.15 | 0.70 | 0.20 | 0.13 | 0.21 | 0.24 | 0.20 | 0.17 |      |      |

| <b>Instance 5</b>      | <b>Items</b> |      |      |      |      |      |      |      |      |      |      |      |
|------------------------|--------------|------|------|------|------|------|------|------|------|------|------|------|
| <i>Capacity: 14</i>    | 1            | 2    | 3    | 4    | 5    | 6    | 7    | 8    | 9    | 10   | 11   | 12   |
| Value                  | 2            | 3    | 4    | 5    | 6    | 9    | 8    | 7    | 6    | 5    | 8    | 9    |
| Weight                 | 3            | 4    | 6    | 3    | 5    | 13   | 6    | 9    | 2    | 4    | 7    | 7    |
| Density                | 0.67         | 0.75 | 0.67 | 1.67 | 1.20 | 0.69 | 1.33 | 0.78 | 3.00 | 1.25 | 1.14 | 1.29 |
|                        |              |      |      |      |      |      |      |      |      |      |      |      |
| <b>Instance 6</b>      | <b>Items</b> |      |      |      |      |      |      |      |      |      |      |      |
| <i>Capacity: 3,800</i> | 1            | 2    | 3    | 4    | 5    | 6    | 7    | 8    | 9    | 10   | 11   | 12   |
| Value                  | 107          | 35   | 120  | 206  | 88   | 34   | 28   | 110  | 88   | 101  | 74   | 53   |
| Weight                 | 599          | 196  | 670  | 1204 | 502  | 202  | 145  | 600  | 453  | 601  | 404  | 299  |
| Density                | 0.18         | 0.18 | 0.18 | 0.17 | 0.18 | 0.17 | 0.19 | 0.18 | 0.19 | 0.17 | 0.18 | 0.18 |
|                        |              |      |      |      |      |      |      |      |      |      |      |      |
| <b>Instance 7</b>      | <b>Items</b> |      |      |      |      |      |      |      |      |      |      |      |
| <i>Capacity: 1,300</i> | 1            | 2    | 3    | 4    | 5    | 6    | 7    | 8    | 9    | 10   | 11   | 12   |
| Value                  | 201          | 84   | 113  | 303  | 227  | 251  | 129  | 147  | 86   | 127  | 144  | 167  |
| Weight                 | 192          | 80   | 106  | 288  | 212  | 240  | 121  | 140  | 82   | 120  | 137  | 160  |
| Density                | 1.05         | 1.05 | 1.07 | 1.05 | 1.07 | 1.05 | 1.07 | 1.05 | 1.05 | 1.06 | 1.05 | 1.04 |
|                        |              |      |      |      |      |      |      |      |      |      |      |      |
| <b>Instance 8</b>      | <b>Items</b> |      |      |      |      |      |      |      |      |      |      |      |
| <i>Capacity: 265</i>   | 1            | 2    | 3    | 4    | 5    | 6    | 7    | 8    | 9    | 10   |      |      |
| Value                  | 31           | 141  | 46   | 30   | 74   | 105  | 119  | 160  | 59   | 71   |      |      |
| Weight                 | 21           | 97   | 32   | 21   | 52   | 75   | 86   | 116  | 43   | 54   |      |      |
| Density                | 1.48         | 1.45 | 1.44 | 1.43 | 1.42 | 1.40 | 1.38 | 1.38 | 1.37 | 1.31 |      |      |

**Table S2.** Properties of the instances of the 0-1 knapsack problem used in the experiment.

| <b>Instance</b>                               | <b>1</b> | <b>2</b> | <b>3</b> | <b>4</b> | <b>5</b> | <b>6</b> | <b>7</b> | <b>8</b> |
|-----------------------------------------------|----------|----------|----------|----------|----------|----------|----------|----------|
| Number of available items                     | 10       | 10       | 12       | 10       | 12       | 12       | 12       | 10       |
| Pearson correlation value/weight              | 0.955    | 0.903    | 0.929    | 0.856    | 0.856    | 0.997    | 1.000    | 0.998    |
| Number of vertices in $G$                     | 255      | 691      | 2,278    | 386      | 145      | 3,273    | 3,640    | 385      |
| Number of terminal vertices in $G$            | 80       | 22       | 399      | 36       | 65       | 240      | 301      | 82       |
| Number of edges in $G$                        | 796      | 3,018    | 11,100   | 1,439    | 369      | 17,892   | 20,587   | 1,377    |
| Pearson correlation value/ $\ell$ of vertices | -0.10    | -0.23    | -0.32    | -0.41    | -0.32    | -0.18    | -0.30    | 0.04     |
| Number of items in solution                   | 4        | 5        | 5        | 7        | 4        | 9        | 7        | 3        |
| Input size ( $I \log_2 C$ )                   | 109      | 100      | 117      | 105      | 46       | 143      | 124      | 80       |
| Sahni- $k$                                    | 1        | 3        | 2        | 0        | 1        | 1        | 4        | 3        |
| Success rate                                  | 0.44     | 0.36     | 0.48     | 0.74     | 0.33     | 0.22     | 0.03     | 0.34     |
| Mean $\ell$ of attempt                        | 2.0      | 2.7      | 1.6      | 0.8      | 2.3      | 3.3      | 4.9      | 3.4      |
| Mean attempt value (% of solution value)      | 0.97     | 0.98     | 0.96     | 0.96     | 0.96     | 0.99     | 0.99     | 0.98     |
| Mean length of search path                    | 31.6     | 37.7     | 25.1     | 33.6     | 21.8     | 38.6     | 40.3     | 38.2     |
| Mean % of vertices visited                    | 0.07     | 0.03     | 0.01     | 0.05     | 0.08     | 0.01     | 0.01     | 0.06     |
| % of vertices visited (group)                 | 0.80     | 0.39     | 0.11     | 0.54     | 0.71     | 0.19     | 0.18     | 0.17     |
| Mean % of terminal vertices visited           | 0.05     | 0.12     | 0.01     | 0.09     | 0.05     | 0.02     | 0.02     | 0.06     |
| % of terminal vertices visited (group)        | 0.78     | 0.82     | 0.14     | 0.67     | 0.62     | 0.37     | 0.42     | 0.74     |

**Table S3.** Relation between performance and effort at the level of individual attempts. Models (1) and (2) related the value achieved in an attempt, normalised by the value of the solution, to the length of the search path (1) and clock time (2). Models (3) and (4) related success in a single attempt to the length of the search path (3) and clock time spent on the attempt (4). All models had random effects for participants on the intercept.

| <i>Dependent variable:</i> |                           |                |                      |                   |
|----------------------------|---------------------------|----------------|----------------------|-------------------|
|                            | Attempt correct           |                | Value                |                   |
|                            | <i>Generalized linear</i> |                | <i>linear</i>        |                   |
|                            | <i>mixed-effects</i>      |                | <i>mixed-effects</i> |                   |
|                            | (1)                       | (2)            | (3)                  | (4)               |
| Length of search path      | -0.005 (0.006)            |                | 0.0003* (0.0002)     |                   |
| Clock time on attempt      |                           | -0.001 (0.003) |                      | 0.0002** (0.0001) |
| Constant                   | -0.323 (0.502)            | -0.389 (0.260) | 0.945*** (0.012)     | 0.963*** (0.008)  |
| Observations               | 308                       | 308            | 308                  | 308               |
| Log Likelihood             | -201.093                  | -200.865       | 436.062              | 435.946           |
| Akaike Inf. Crit.          | 408.185                   | 407.730        | -864.124             | -863.891          |

*Note:* \*p<0.05; \*\*p<0.01; \*\*\*p<0.001

**Table S4.** Relation between performance and size and complexity of instances. Results of estimation of generalized linear mixed models relating success in an attempt to number of items in the instance (1), number of vertices in the instance graph (2), number of terminal vertices (3), input size (4), Sahni- $k$  (5), Pearson correlation between values and weights of items available in the instance (6) and factorial model with Sahni- $k$  and Pearson correlation between values and weights (7). All models had random effects for participants on the intercept.

|                                  | <i>Dependent variable:</i> |                     |                  |                |                   |                 |                |
|----------------------------------|----------------------------|---------------------|------------------|----------------|-------------------|-----------------|----------------|
|                                  | (1)                        | (2)                 | (3)              | (4)            | (5)               | (6)             | (7)            |
| Number of items                  | -0.471*** (0.126)          |                     |                  |                |                   |                 |                |
| Number of vertices               |                            | -0.0004*** (0.0001) |                  |                |                   |                 |                |
| Number of terminal vertices      |                            |                     | -0.003** (0.001) |                |                   |                 |                |
| Input size                       |                            |                     |                  | -0.005 (0.004) |                   |                 |                |
| Sahni- $k$                       |                            |                     |                  |                | -0.514*** (0.108) |                 | 0.567 (1.817)  |
| Pearson correlation value/weight |                            |                     |                  |                |                   | -2.672* (1.169) | 1.183 (2.535)  |
| sahni.k:item.corr.pearson        |                            |                     |                  |                |                   |                 | -1.138 (1.918) |
| Constant                         | 4.593*** (1.380)           | -0.004 (0.207)      | -0.176 (0.213)   | -0.017 (0.475) | 0.343 (0.249)     | 1.875 (1.073)   | -0.755 (2.297) |
| Observations                     | 308                        | 308                 | 308              | 308            | 308               | 308             | 308            |
| Log Likelihood                   | -193.951                   | -190.612            | -197.426         | -200.497       | -188.555          | -198.591        | -188.376       |
| Akaike Inf. Crit.                | 393.902                    | 387.224             | 400.853          | 406.993        | 383.110           | 403.181         | 386.752        |

*Note:* \* $p < 0.05$ ; \*\* $p < 0.01$ ; \*\*\* $p < 0.001$

**Table S5.** Relation between performance and extent of search. Results of estimation of generalized linear mixed models relating success in an attempt to proportion of vertices in instance graph visited (1) and proportion of terminal vertices visited (2), and results of linear mixed model relating the value of an attempt, normalised by the value of the solution, to proportion of vertices in instance graph visited (3) and proportion of terminal vertices visited (4). All models had random effects for participants on the intercept.

|                                |  | <i>Dependent variable:</i>              |                   |                             |                  |
|--------------------------------|--|-----------------------------------------|-------------------|-----------------------------|------------------|
|                                |  | Attempt correct                         |                   | Value of attempt            |                  |
|                                |  | <i>Generalized linear mixed-effects</i> |                   | <i>Linear mixed-effects</i> |                  |
|                                |  | (1)                                     | (2)               | (3)                         | (4)              |
| % of vertices visited          |  | 4.853 (3.217)                           |                   | -0.052 (0.086)              |                  |
| % of terminal vertices visited |  |                                         | 5.102* (2.302)    |                             | 0.062 (0.060)    |
| Constant                       |  | -0.747*** (0.208)                       | -0.827*** (0.205) | 0.976*** (0.006)            | 0.971*** (0.006) |
| Observations                   |  | 308                                     | 308               | 308                         | 308              |
| Log Likelihood                 |  | -200.080                                | -198.662          | 440.411                     | 440.408          |
| Akaike Inf. Crit.              |  | 406.160                                 | 403.324           | -872.823                    | -872.816         |

*Note:* \*p<0.05; \*\*p<0.01; \*\*\*p<0.001

**Table S6.** Relation between computational performance and variation in search. Results of estimation of generalised linear mixed models relating success in an attempt to Sahni- $k$ , the mean distance  $\ell_G$  between subsequent terminal vertices visited during an attempt (Supplementary Methods 1.2) and the interaction between Sahni- $k$  and mean distance between subsequent terminal vertices. The model had random effects for participants on the intercept.

| <i>Dependent variable:</i>               |                   |
|------------------------------------------|-------------------|
| <i>Attempt correct</i>                   |                   |
| Sahni- $k$                               | −1.207*** (0.294) |
| Mean distance between terminal vertices  | −0.414 (0.264)    |
| Interaction Sahni- $k$ and mean distance | 0.354** (0.134)   |
| Constant                                 | 1.115* (0.531)    |
| Observations                             | 279               |
| Log Likelihood                           | −167.373          |
| Akaike Inf. Crit.                        | 344.745           |

*Note:*

\* $p < 0.05$ ; \*\* $p < 0.01$ ; \*\*\* $p < 0.001$



**Table S7.** Path dependence in search. Results of estimation of linear mixed models relating distance  $\ell_G$  between the last vertex in an attempt and the solution vertex (Supplementary Methods 1.2), to the distance of the first terminal vertex in an attempt from the solution vertex (1) and the mean change in distances between subsequent terminal vertices (2). The models had random effects for participants on the intercept.

|                                        | <i>Dependent variable:</i> |                  |
|----------------------------------------|----------------------------|------------------|
|                                        | Distance                   |                  |
|                                        | (1)                        | (2)              |
| Distance first to last terminal vertex | 0.560*** (0.050)           |                  |
| Change in distances                    |                            | 1.036*** (0.055) |
| Constant                               | 0.566* (0.221)             | 4.226*** (0.134) |
| Observations                           | 304                        | 304              |
| Log Likelihood                         | -638.128                   | -571.910         |
| Akaike Inf. Crit.                      | 1,284.257                  | 1,151.819        |

*Note:*

\* $p < 0.05$ ; \*\* $p < 0.01$ ; \*\*\* $p < 0.001$
